# Supplementary material for: Accurate mass analysis and structure elucidation of selenium metabolites by liquid chromatography electrospray time-of-flight mass spectrometry
Source: Royal Society of Chemistry journal article supplement (doi:10.1039/b703545d), 2007-01-01
Supplement: b703545d.pdf [file b703545d.pdf]

## Accurate mass analysis and structure elucidation of selenium metabolites by liquid chromatography electrospray time-of-flight mass spectrometry

Juan F. García-Reyes<sup>1,2</sup>, Mihaly Dernovics<sup>3</sup>, Pilar Ortega-Barrales<sup>1</sup>, Amadeo R. Fernández-Alba<sup>2</sup> and Antonio Molina-Díaz<sup>1\*</sup>

<sup>1</sup> Department of Physical and Analytical Chemistry, University of Jaén, 23071 Jaén, Spain

<sup>2</sup> Department of Hydrogeology and Analytical Chemistry, University of Almería, 04120 La Cañada de San Urbano, Almería, Spain

<sup>3</sup> Department of Applied Chemistry, Corvinus University of Budapest, 1118 Budapest, Hungary

### Electronic Supplementary Data

Accurate mass analysis performed on the studied selenized compounds ( $m/z$  661,  $m/z$  425.9 and  $m/z$  513) and their characteristic fragment ions are included in the following tables

#### Table captions

**Table S1.** Accurate mass analysis of doubly selenised species with  $m/z$  661, detected at 17.65 minutes. Elemental composition calculator tool: C [0-50]; H [0-100]; O [0-30]; N [0-25]; S [0-0] and Se [2-2].

**Table S2.** Accurate mass analysis of the fragment ions from in-source CID fragmentation of  $m/z$  661:  $m/z$  526,  $m/z$  508,  $m/z$  410,  $m/z$  330 and  $m/z$  136. Elemental composition calculator tool: C [0-50]; H [0-100]; O [0-30]; N [0-25]; S [0-0] (except for  $m/z$  330, S [0-2]) and Se [0-0],[1-1] or [2-2] depending on the isotopic profile.

**Table S3.** Accurate mass analysis of unknown doubly selenised species with  $m/z$  425.9, detected at 20.0 minutes. Elemental composition calculator tool: C [0-50]; H [0-100]; O [0-30]; N [0-25]; S [0-2] and Se [2-2].

**Table S4.** Accurate mass analysis of in-source fragment ions from selenized species with  $m/z$  425.9. Elemental composition calculator tool: C [0-50]; H [0-100]; O [0-30]; N [0-25]; S [0-0] and Se [0-0],[1-1] or [2-2] depending on the isotopic profile.

**Table S5.** Accurate mass analysis of unknown doubly selenised species with  $m/z$  513 detected at 10.7 minutes. Elemental composition calculator tool: C [0-50]; H [0-100]; O [0-30]; N [0-25]; S [0-2] and Se [2-2].

**Table S6.** Accurate mass analysis of fragment ions from  $m/z$  513. Elemental composition calculator tool: C [0-50]; H [0-100]; O [0-30]; N [0-25]; S [0-0] and Se [0-0], [1-1] or [2-2] depending on the isotopic profile. Both odd and even electron states are included.

---

\* Corresponding author: Antonio Molina-Díaz; E-mail: [amolina@ujaen.es](mailto:amolina@ujaen.es); Department of Physical and Analytical Chemistry, University of Jaén, Campus Las Lagunillas, E-23071 Jaén, Spain.

**Table S1.** Accurate mass analysis of doubly selenised species with  $m/z$  661, detected at 17.65 minutes. Elemental composition calculator tool: C [0-50]; H [0-100]; O [0-30]; N [0-25]; S [0-0] and Se [2-2].

|                                  | <b>Formula</b>                                                                  | <b>Calculated <math>m/z</math></b> | <b>Error<br/>(mDa)</b> | <b>Error<br/>(ppm)</b> | <b>DBE</b>  |
|----------------------------------|---------------------------------------------------------------------------------|------------------------------------|------------------------|------------------------|-------------|
| <b><math>m/z</math> 661.0283</b> | <b>C<sub>20</sub>H<sub>25</sub>N<sub>10</sub>O<sub>6</sub>Se<sub>2</sub></b>    | <b>661.0283</b>                    | <b>-0.0463</b>         | <b>-0.0701</b>         | <b>15.5</b> |
|                                  | C <sub>5</sub> H <sub>21</sub> N <sub>22</sub> O <sub>7</sub> Se <sub>2</sub>   | 661.0288                           | -0.5489                | -0.8303                | 8.5         |
|                                  | C <sub>4</sub> H <sub>25</sub> N <sub>18</sub> O <sub>11</sub> Se <sub>2</sub>  | 661.0275                           | 0.7883                 | 1.1926                 | 3.5         |
|                                  | C <sub>19</sub> H <sub>29</sub> N <sub>6</sub> O <sub>10</sub> Se <sub>2</sub>  | 661.027                            | 1.2909                 | 1.9529                 | 10.5        |
|                                  | C <sub>23</sub> H <sub>3</sub> O <sub>12</sub> Se <sub>2</sub>                  | 661.0296                           | -1.3944                | -2.1094                | 9.5         |
|                                  | C <sub>8</sub> H <sub>29</sub> N <sub>12</sub> O <sub>13</sub> Se <sub>2</sub>  | 661.0301                           | -1.8969                | -2.87                  | 2.5         |
|                                  | C <sub>18</sub> H <sub>33</sub> N <sub>2</sub> O <sub>14</sub> Se <sub>2</sub>  | 661.0256                           | 2.639                  | 3.9923                 | 5.5         |
|                                  | C <sub>16</sub> H <sub>21</sub> N <sub>16</sub> O <sub>4</sub> Se <sub>2</sub>  | 661.0256                           | 2.639                  | 3.992                  | 16.5        |
|                                  | C <sub>24</sub> H <sub>29</sub> N <sub>4</sub> O <sub>8</sub> Se <sub>2</sub>   | 661.031                            | -2.73                  | -4.13                  | 14.5        |
|                                  | C <sub>9</sub> H <sub>25</sub> N <sub>16</sub> O <sub>9</sub> Se <sub>2</sub>   | 661.0315                           | -3.234                 | -4.892                 | 7.5         |
|                                  | H <sub>21</sub> N <sub>24</sub> O <sub>9</sub> Se <sub>2</sub>                  | 661.0248                           | 3.4737                 | 5.255                  | 4.5         |
|                                  | C <sub>15</sub> H <sub>25</sub> N <sub>12</sub> O <sub>8</sub> Se <sub>2</sub>  | 661.0243                           | 3.976                  | 6.015                  | 11.5        |
|                                  | C <sub>25</sub> H <sub>25</sub> N <sub>8</sub> O <sub>4</sub> Se <sub>2</sub>   | 661.0323                           | -4.069                 | -6.15                  | 19.5        |
|                                  | C <sub>30</sub> H <sub>29</sub> O <sub>7</sub> Se <sub>2</sub>                  | 661.0238                           | 4.4789                 | 6.777                  | 18.5        |
|                                  | C <sub>10</sub> H <sub>21</sub> N <sub>20</sub> O <sub>5</sub> Se <sub>2</sub>  | 661.0328                           | -4.5716                | -6.9159                | 12.5        |
|                                  | C <sub>12</sub> H <sub>33</sub> N <sub>6</sub> O <sub>15</sub> Se <sub>2</sub>  | 661.0328                           | -4.5823                | -6.9322                | 1.5         |
|                                  | C <sub>14</sub> H <sub>29</sub> N <sub>8</sub> O <sub>12</sub> Se <sub>2</sub>  | 661.0256                           | 5.3132                 | -0.070                 | 6.5         |
|                                  | C <sub>12</sub> H <sub>17</sub> N <sub>22</sub> O <sub>2</sub> Se <sub>2</sub>  | 661.0229                           | 5.32                   | 8.05                   | 17.5        |
|                                  | C <sub>11</sub> H <sub>17</sub> N <sub>24</sub> OSe <sub>2</sub>                | 661.0342                           | -5.9089                | -8.94                  | 17.5        |
|                                  | C <sub>13</sub> H <sub>29</sub> N <sub>10</sub> O <sub>11</sub> Se <sub>2</sub> | 661.0342                           | -5.9196                | -8.95                  | 6.5         |

**Table S2.** Accurate mass analysis of the fragment ions from in-source CID fragmentation of  $m/z$  661:  $m/z$  526,  $m/z$  508,  $m/z$  410,  $m/z$  330 and  $m/z$  136. Elemental composition calculator tool: C [0-50]; H [0-100]; O [0-30]; N [0-25]; S [0-0] (except for  $m/z$  330, S [0-2]) and Se [0-0],[1-1] or [2-2] depending on the isotopic profile.

|                                  | <b>Formula</b>                                                                 | <b>Calculated <math>m/z</math></b> | <b>Error<br/>(mDa)</b> | <b>Error<br/>(ppm)</b> | <b>DBE</b>  |
|----------------------------------|--------------------------------------------------------------------------------|------------------------------------|------------------------|------------------------|-------------|
| <b><math>m/z</math> 525.9749</b> |                                                                                |                                    |                        |                        |             |
|                                  | C <sub>16</sub> H <sub>16</sub> N <sub>9</sub> O <sub>2</sub> Se <sub>2</sub>  | 525.9751                           | -0.2884                | -0.5483                | 15.5        |
|                                  | H <sub>16</sub> N <sub>17</sub> O <sub>7</sub> Se <sub>2</sub>                 | 525.9743                           | 0.5463                 | 1.0386                 | 3.5         |
|                                  | CH <sub>12</sub> N <sub>21</sub> O <sub>3</sub> Se <sub>2</sub>                | 525.9756                           | -0.7909                | -1.5038                | 8.5         |
|                                  | <b>C<sub>15</sub>H<sub>20</sub>N<sub>5</sub>O<sub>6</sub>Se<sub>2</sub></b>    | <b>525.9738</b>                    | <b>1.0489</b>          | <b>1.9941</b>          | <b>10.5</b> |
|                                  | C <sub>4</sub> H <sub>20</sub> N <sub>11</sub> O <sub>9</sub> Se <sub>2</sub>  | 525.977                            | -2.139                 | -4.067                 | 2.5         |
|                                  | C <sub>14</sub> H <sub>24</sub> NO <sub>10</sub> Se <sub>2</sub>               | 525.9725                           | 2.3862                 | 4.537                  | 5.5         |
|                                  | C <sub>12</sub> H <sub>12</sub> N <sub>15</sub> Se <sub>2</sub>                | 525.9725                           | 2.3969                 | 4.557                  | 16.5        |
|                                  | C <sub>20</sub> H <sub>20</sub> N <sub>3</sub> O <sub>4</sub> Se <sub>2</sub>  | 525.9778                           | -2.9738                | -5.65                  | 14.5        |
|                                  | C <sub>5</sub> H <sub>16</sub> N <sub>15</sub> O <sub>5</sub> Se <sub>2</sub>  | 525.9783                           | -3.4763                | -6.61                  | 7.5         |
|                                  | C <sub>11</sub> H <sub>16</sub> N <sub>11</sub> O <sub>4</sub> Se <sub>2</sub> | 525.9711                           | 3.7342                 | 7.10                   | 11.5        |
|                                  | C <sub>21</sub> H <sub>16</sub> N <sub>7</sub> Se <sub>2</sub>                 | 525.9792                           | -4.311                 | -8.20                  | 19.5        |
|                                  | C <sub>6</sub> H <sub>12</sub> N <sub>19</sub> OSe <sub>2</sub>                | 525.9797                           | -4.8136                | -9.15                  | 12.5        |
|                                  | C <sub>8</sub> H <sub>24</sub> N <sub>5</sub> O <sub>11</sub> Se <sub>2</sub>  | 525.9797                           | -4.8244                | -9.17                  | 1.5         |
|                                  | C <sub>10</sub> H <sub>20</sub> N <sub>7</sub> O <sub>8</sub> Se <sub>2</sub>  | 525.9698                           | -4.069                 | 9.64                   | 6.5         |
| <b><math>m/z</math> 507.9621</b> |                                                                                |                                    |                        |                        |             |
|                                  | C <sub>14</sub> H <sub>22</sub> NO <sub>9</sub> Se <sub>2</sub>                | 507.9619                           | 0.1509                 | -0.297                 | 6.5         |
|                                  | <b>C<sub>15</sub>H<sub>18</sub>N<sub>5</sub>O<sub>5</sub>Se<sub>2</sub></b>    | <b>507.9632</b>                    | <b>-1.1863</b>         | <b>-2.33</b>           | <b>11.5</b> |
|                                  | C <sub>11</sub> H <sub>14</sub> N <sub>11</sub> O <sub>3</sub> Se <sub>2</sub> | 507.9606                           | 1.499                  | 2.95                   | 12.5        |
|                                  | H <sub>14</sub> N <sub>17</sub> O <sub>6</sub> Se <sub>2</sub>                 | 507.9637                           | -1.6889                | -3.3249                | 4.5         |
|                                  | C <sub>16</sub> H <sub>14</sub> N <sub>9</sub> OSe <sub>2</sub>                | 507.9646                           | -2.52                  | -4.968                 | 16.5        |
|                                  | C <sub>10</sub> H <sub>18</sub> N <sub>7</sub> O <sub>7</sub> Se <sub>2</sub>  | 507.9592                           | 2.83                   | 5.584                  | 7.5         |
|                                  | CH <sub>10</sub> N <sub>21</sub> O <sub>2</sub> Se <sub>2</sub>                | 507.9651                           | -3.02                  | -5.957                 | 9.5         |
|                                  | C <sub>9</sub> H <sub>22</sub> N <sub>3</sub> O <sub>11</sub> Se <sub>2</sub>  | 507.9579                           | 4.1736                 | 8.22                   | 2.5         |
|                                  | C <sub>7</sub> H <sub>10</sub> N <sub>17</sub> OSe <sub>2</sub>                | 507.9579                           | 4.1844                 | 8.24                   | 13.5        |
|                                  | C <sub>4</sub> H <sub>18</sub> N <sub>11</sub> O <sub>8</sub> Se <sub>2</sub>  | 507.9664                           | -4.3743                | -8.61                  | 3.5         |

|                            |                                                                             |                 |                |              |            |
|----------------------------|-----------------------------------------------------------------------------|-----------------|----------------|--------------|------------|
| <b><i>m/z</i> 409.9276</b> |                                                                             |                 |                |              |            |
|                            | <b>C<sub>10</sub>H<sub>12</sub>N<sub>5</sub>O<sub>3</sub>Se<sub>2</sub></b> | <b>409.9265</b> | <b>1.0931</b>  | <b>2.66</b>  | <b>9.5</b> |
|                            | C <sub>9</sub> H <sub>16</sub> NO <sub>7</sub> Se <sub>2</sub>              | 409.9251        | 2.43           | 5.93         | 4.5        |
|                            | C <sub>15</sub> H <sub>12</sub> N <sub>3</sub> OSe <sub>2</sub>             | 409.9305        | -2.93          | -7.15        | 13.5       |
|                            | H <sub>8</sub> N <sub>15</sub> O <sub>2</sub> Se <sub>2</sub>               | 409.931         | -3.43          | -8.37        | 6.5        |
|                            | C <sub>6</sub> H <sub>8</sub> N <sub>11</sub> OSe <sub>2</sub>              | 409.9238        | 3.78           | 9.22         | 10.5       |
| <b><i>m/z</i> 330.0096</b> |                                                                             |                 |                |              |            |
|                            | C <sub>10</sub> H <sub>20</sub> NO <sub>2</sub> S <sub>2</sub> Se           | 330.0095        | 0.0803         | 0.24         | 2.5        |
|                            | C <sub>12</sub> H <sub>16</sub> N <sub>7</sub> O <sub>5</sub> SSe           | 330.0093        | 0.2643         | 0.80         | -0.5       |
|                            | <b>C<sub>10</sub>H<sub>12</sub>N<sub>5</sub>O<sub>3</sub>Se</b>             | <b>330.0099</b> | <b>-0.3863</b> | <b>-1.17</b> | <b>8.5</b> |
|                            | C <sub>9</sub> H <sub>16</sub> NO <sub>7</sub> Se                           | 330.0086        | 0.9509         | 2.88         | 3.5        |
|                            | C <sub>3</sub> H <sub>12</sub> N <sub>11</sub> OSSe                         | 330.0106        | -1.0729        | -3.25        | 4.5        |
|                            | C <sub>6</sub> H <sub>8</sub> N <sub>11</sub> OSe                           | 330.0073        | 2.299          | 6.966        | 9.5        |
|                            | C <sub>6</sub> H <sub>16</sub> N <sub>7</sub> S <sub>2</sub> Se             | 330.0068        | 2.7657         | 8.381        | 3.5        |
| <b><i>m/z</i> 136.0621</b> |                                                                             |                 |                |              |            |
|                            | <b>C<sub>5</sub>H<sub>6</sub>N<sub>5</sub></b>                              | <b>136.0617</b> | <b>0.33</b>    | <b>2.4</b>   | <b>5.5</b> |

**Table S3.** Accurate mass analysis of unknown doubly selenised species with  $m/z$  425.9, detected at 20.0 minutes. Elemental composition calculator tool: C [0-50]; H [0-100]; O [0-30]; N [0-25]; S [0-2] and Se [2-2].

|                                  | Formula                                    | Calculated $m/z$ | Error (mDa)  | Error (ppm) | DBE        |
|----------------------------------|--------------------------------------------|------------------|--------------|-------------|------------|
| <b><math>m/z</math> 425.9585</b> | $C_4H_{16}N_{11}OSSe_2$                    | 425.9584         | 0.0064       | 0.015       | 4.5        |
|                                  | <b><math>C_{11}H_{16}N_5O_3Se_2</math></b> | <b>425.9578</b>  | <b>0.693</b> | <b>1.63</b> | <b>8.5</b> |
|                                  | $C_{11}H_{24}NO_2S_2Se_2$                  | 425.9573         | 1.16         | 2.72        | 2.5        |
|                                  | $C_3H_{20}N_7O_5SSe_2$                     | 425.9571         | 1.34         | 3.15        | -0.5       |
|                                  | $C_{10}H_{20}NO_7Se_2$                     | 425.9564         | 2.03         | 4.77        | 3.5        |
|                                  | $H_{16}N_{11}O_6Se_2$                      | 425.9609         | -2.49        | -5.86       | 0.5        |
|                                  | $C_8H_{20}N_5O_3SSe_2$                     | 425.9611         | -2.68        | -6.29       | 3.5        |
|                                  | $C_{16}H_{16}N_3OSe_2$                     | 425.9618         | -3.33        | -7.82       | 12.5       |
|                                  | $CH_{20}N_{11}OSe_2$                       | 425.9618         | -3.36        | -7.90       | -0.5       |
|                                  | $C_7H_{12}N_{11}OSe_2$                     | 425.9551         | 3.38         | 7.93        | 9.5        |
|                                  | $CH_{12}N_{15}O_2Se_2$                     | 425.9623         | -3.83        | -9.00       | 5.5        |
|                                  | $C_7H_{20}N_7S_2Se_2$                      | 425.9546         | 3.84         | 9.03        | 3.5        |

**Table S4.** Accurate mass analysis of in-source fragment ions from selenized species with  $m/z$  425.9. Elemental composition calculator tool: C [0-50]; H [0-100]; O [0-30]; N [0-25]; S [0-0] and Se [0-0],[1-1] or [2-2] depending on the isotopic profile.

|                                  | <b>Formula</b>                                                 | <b>Calculated <math>m/z</math></b> | <b>Error<br/>(mDa)</b> | <b>Error<br/>(ppm)</b> | <b>DBE</b> |
|----------------------------------|----------------------------------------------------------------|------------------------------------|------------------------|------------------------|------------|
| <b><math>m/z</math> 309.9100</b> |                                                                |                                    |                        |                        |            |
| <b><math>m/z</math> 290.9020</b> | <b>C<sub>6</sub>H<sub>8</sub>N<sub>5</sub>Se<sub>2</sub></b>   | <b>309.91046</b>                   | <b>-0.46</b>           | <b>-1.49</b>           | <b>7.5</b> |
|                                  | C <sub>5</sub> H <sub>12</sub> NO <sub>4</sub> Se <sub>2</sub> | 309.90912                          | 0.87                   | 2.82                   | 2.5        |
|                                  | <b>C<sub>6</sub>H<sub>11</sub>O<sub>3</sub>Se<sub>2</sub></b>  | <b>290.9033</b>                    | <b>-1.31</b>           | <b>-4.51</b>           | <b>3.5</b> |
|                                  | C <sub>2</sub> H <sub>7</sub> N <sub>6</sub> OSe <sub>2</sub>  | 290.9006                           | 1.37                   | 4.72                   | 4.5        |
|                                  | CH <sub>11</sub> N <sub>2</sub> O <sub>5</sub> Se <sub>2</sub> | 290.8992                           | 2.71                   | 9.32                   | -0.5       |
| <b><math>m/z</math> 229.9937</b> |                                                                |                                    |                        |                        |            |
| <b><math>m/z</math> 174.8560</b> | <b>C<sub>6</sub>H<sub>8</sub>N<sub>5</sub>Se</b>               | <b>229.9939</b>                    | <b>-0.24</b>           | <b>-1.05</b>           | <b>6.5</b> |
|                                  | C <sub>5</sub> H <sub>12</sub> NO <sub>4</sub> Se              | 229.9926                           | 1.095                  | 4.76                   | 1.5        |
| <b><math>m/z</math> 136.0614</b> | <b>CH<sub>3</sub>Se<sub>2</sub></b>                            | <b>174.85596</b>                   | <b>0.032</b>           | <b>0.18</b>            | <b>2.5</b> |
|                                  | <b>C<sub>5</sub>H<sub>6</sub>N<sub>5</sub></b>                 | <b>136.0617</b>                    | <b>-0.37</b>           | <b>-2.73</b>           | <b>5.5</b> |

**Table S5.** Accurate mass analysis of unknown doubly selenised species with  $m/z$  513 detected at 10.7 minutes. Elemental composition calculator tool: C [0-50]; H [0-100]; O [0-30]; N [0-25]; S [0-2] and Se [2-2].

|                                  | <b>Formula</b>                                                                               | <b>Calculated <math>m/z</math></b> | <b>Error<br/>(mDa)</b> | <b>Error<br/>(ppm)</b> | <b>DBE</b> |
|----------------------------------|----------------------------------------------------------------------------------------------|------------------------------------|------------------------|------------------------|------------|
| <b><math>m/z</math> 512.9900</b> |                                                                                              |                                    |                        |                        |            |
|                                  | C <sub>22</sub> H <sub>25</sub> O <sub>2</sub> SSe <sub>2</sub>                              | 512.99001                          | -0.0195                | -0.038                 | 12.5       |
|                                  | <b>C<sub>14</sub>H<sub>21</sub>N<sub>6</sub>O<sub>5</sub>Se<sub>2</sub></b>                  | <b>512.98983</b>                   | <b>0.164</b>           | <b>0.32</b>            | <b>9.5</b> |
|                                  | C <sub>7</sub> H <sub>21</sub> N <sub>12</sub> O <sub>3</sub> SSe <sub>2</sub>               | 512.99052                          | -0.52                  | -1.02                  | 5.5        |
|                                  | C <sub>14</sub> H <sub>29</sub> N <sub>2</sub> O <sub>4</sub> S <sub>2</sub> Se <sub>2</sub> | 512.98936                          | 0.63                   | 1.23                   | 3.5        |
|                                  | C <sub>15</sub> H <sub>25</sub> N <sub>6</sub> S <sub>2</sub> Se <sub>2</sub>                | 512.9907                           | -0.706                 | -1.376                 | 8.5        |
|                                  | C <sub>6</sub> H <sub>25</sub> N <sub>8</sub> O <sub>7</sub> SSe <sub>2</sub>                | 512.98918                          | 0.815                  | 1.589                  | 0.5        |
|                                  | C <sub>15</sub> H <sub>17</sub> N <sub>10</sub> OSe <sub>2</sub>                             | 512.99117                          | -1.17                  | -2.28                  | 14.5       |
|                                  | H <sub>21</sub> N <sub>18</sub> OS <sub>2</sub> Se <sub>2</sub>                              | 512.9912                           | -1.208                 | -2.356                 | 1.5        |
|                                  | C <sub>13</sub> H <sub>25</sub> N <sub>2</sub> O <sub>9</sub> Se <sub>2</sub>                | 512.98849                          | 1.50                   | 2.927                  | 4.5        |
|                                  | H <sub>13</sub> N <sub>22</sub> O <sub>2</sub> Se <sub>2</sub>                               | 512.99167                          | -1.675                 | -3.26                  | 7.5        |
|                                  | C <sub>3</sub> H <sub>17</sub> N <sub>18</sub> O <sub>5</sub> Se <sub>2</sub>                | 512.98783                          | 2.163                  | 4.21                   | 6.5        |
|                                  | C <sub>18</sub> H <sub>25</sub> O <sub>7</sub> Se <sub>2</sub>                               | 512.99252                          | -2.521                 | -4.91                  | 8.5        |

**Table S6.** Accurate mass analysis of fragment ions from  $m/z$  513. Elemental composition calculator tool: C [0-50]; H [0-100]; O [0-30]; N [0-25]; S [0-0] and Se [0-0], [1-1] or [2-2] depending on the isotopic profile. Both odd and even electron states are included.

|                                  | <b>Formula</b>                             | <b>Calculated <math>m/z</math></b> | <b>Error<br/>(mDa)</b> | <b>Error<br/>(ppm)</b> | <b>DBE</b> |
|----------------------------------|--------------------------------------------|------------------------------------|------------------------|------------------------|------------|
| <b><math>m/z</math> 410.9358</b> | $C_{12}H_{15}N_2O_4Se_2$                   | 410.93567                          | 0.125                  | 0.30                   | 8.5        |
|                                  | $C_{13}H_{11}N_6Se_2$                      | 410.93701                          | -1.21                  | -2.95                  | 13.5       |
|                                  | <b><math>C_{10}H_{13}N_5O_3Se_2</math></b> | <b>410.93433</b>                   | <b>1.47</b>            | <b>3.57</b>            | <b>9</b>   |
|                                  | $C_{15}H_{13}N_3OSe_2$                     | 410.93835                          | -2.55                  | -6.22                  | 13         |
|                                  | $C_9H_{17}NO_7Se_2$                        | 410.93299                          | 2.805                  | 6.83                   | 4          |
|                                  | $C_8H_{11}N_8O_2Se_2$                      | 410.93298                          | 2.811                  | 6.84                   | 9.5        |
|                                  | $H_9N_{15}O_2Se_2$                         | 410.93885                          | -3.057                 | -7.44                  | 6          |
|                                  | $CH_{15}N_8O_7Se_2$                        | 410.93886                          | -3.062                 | -7.45                  | 0.5        |
|                                  | $C_{17}H_{15}O_2Se_2$                      | 410.93969                          | -3.90                  | -9.48                  | 12.5       |
| <b><math>m/z</math> 181.9710</b> | <b><math>C_4H_8NO_2Se</math></b>           | <b>181.97147</b>                   | <b>-0.47</b>           | <b>2.61</b>            | <b>2.5</b> |
|                                  | $C_2H_6N_4OSe$                             | 181.97013                          | 0.867                  | 4.76                   | 3          |
| <b><math>m/z</math> 136.0615</b> | <b><math>C_5H_6N_5</math></b>              | <b>136.0617</b>                    | <b>-0.27</b>           | <b>-2.0</b>            | <b>5.5</b> |
